# Supplementary material for: Systematic analysis of gene expression profiles reveals prognostic stratification and underlying mechanisms for muscle-invasive bladder cancer
Source: Springer Nature journal article supplement (doi:10.1186/s12935-019-1056-y), 2019-12-01

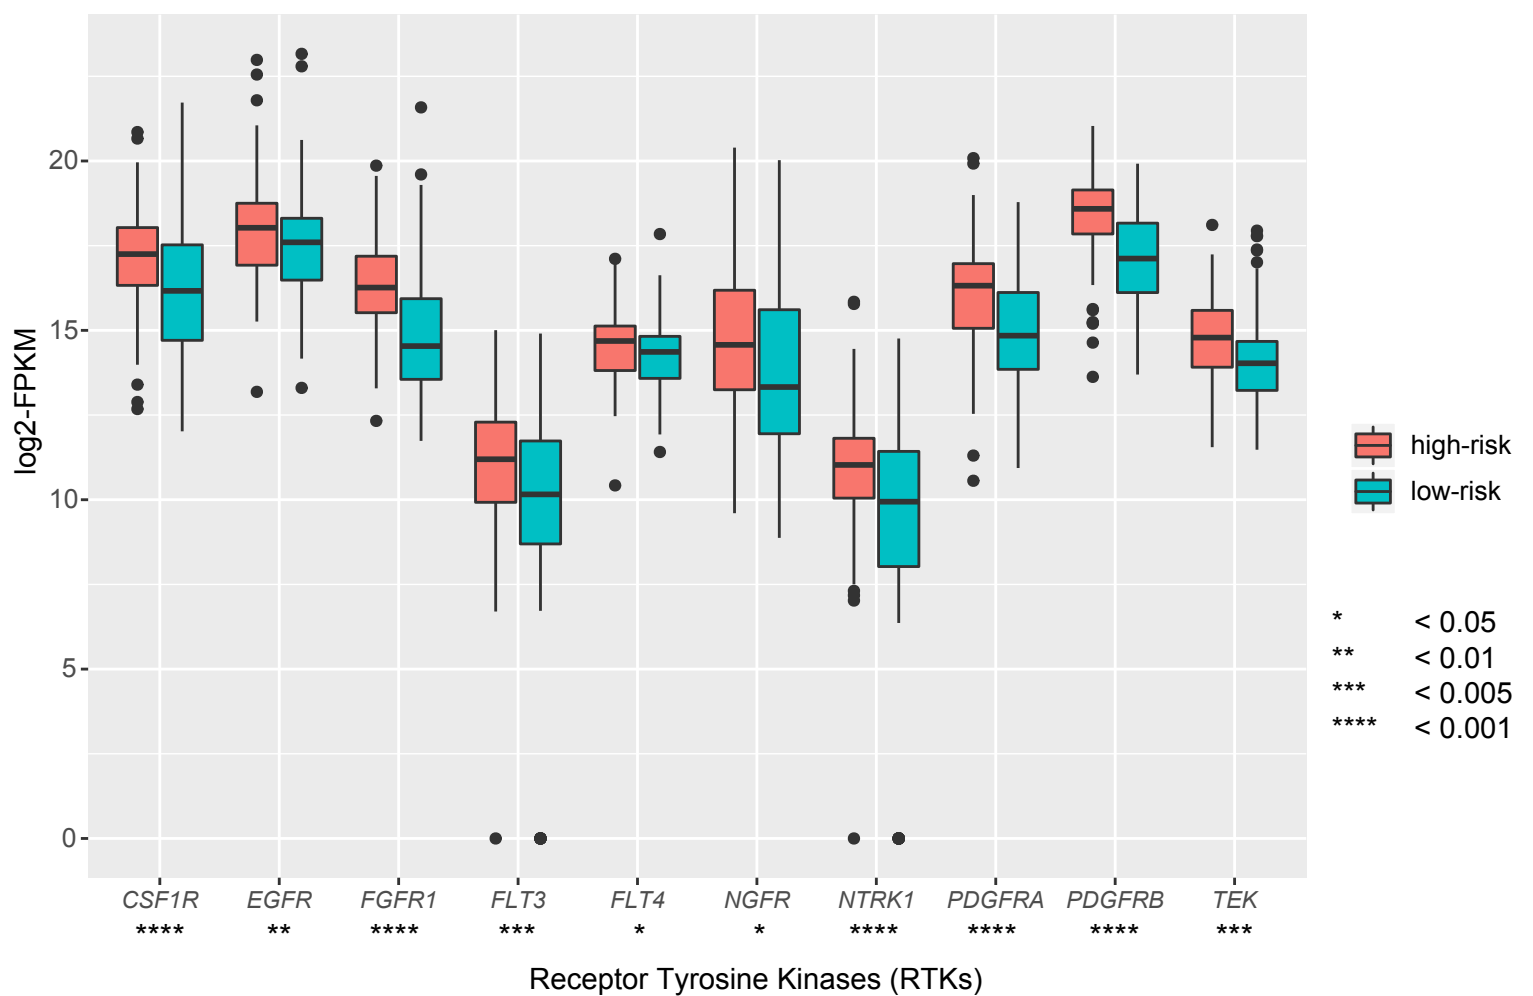

Supplement: MOESM3 [file 23188940]
